# Supplementary material
Source: HighWire-hosted journal article supplement (https://bmjopen.bmj.com/content/14/7/e081509)
Supplement: inline-supplementary-material-1 [file inline-supplementary-material-1.pdf]

1    **Appendix 1. HEAF questions, response categories, coded analysis variables and reference categories (in italics).**

| Question                                                                                                                                            | Response categories                                                                                                                                                                     | Further coding for analysis                                                                                                                                                                                                                                                                                                                                                            |
|-----------------------------------------------------------------------------------------------------------------------------------------------------|-----------------------------------------------------------------------------------------------------------------------------------------------------------------------------------------|----------------------------------------------------------------------------------------------------------------------------------------------------------------------------------------------------------------------------------------------------------------------------------------------------------------------------------------------------------------------------------------|
| Do you have any of the following qualifications?                                                                                                    | o/gcse levels; a levels; vocational cert; university degree; higher professional qualification                                                                                          | no qualifications/school level vs <i>vocational training certificate</i> vs university degree/higher                                                                                                                                                                                                                                                                                   |
| How well do you feel you are managing financially these days?                                                                                       | <i>living comfortably/doing alright/just about getting by</i> ; finding it difficult/very difficult to make ends meet                                                                   |                                                                                                                                                                                                                                                                                                                                                                                        |
| In an average week, outside work, roughly how many hours would you spend doing the following activities?<br>Please give your height and your weight | hours per week physical activities sufficient to make you hot or sweaty<br><br>height reported in feet and inches, or centimetres<br>weight reported in stones and pounds, or kilograms | <i>any hours</i> vs no hours<br><br>Converted to height in metres and weight in kilograms. BMI in kg/m <sup>2</sup> calculated as height divided by the square of weight, and categorised as: normal/underweight <25kg/m <sup>2</sup> ; <i>overweight</i> 25-29.9kg/m <sup>2</sup> ; ≥30kg/m <sup>2</sup> (obese/severely obese).<br>Smoker status coded as: <i>never</i> , ex/current |
| Have you ever smoked regularly?<br>If yes, do you still smoke regularly?                                                                            | no; yes response categories for both questions                                                                                                                                          |                                                                                                                                                                                                                                                                                                                                                                                        |
| In general would you say your health is?                                                                                                            | excellent; very good; good; fair; poor                                                                                                                                                  | 'at least good' vs 'fair/poor'                                                                                                                                                                                                                                                                                                                                                         |
| Which of the following best describes your walking speed?                                                                                           | unable to walk; very slow; stroll at an easy pace; normal pace; fairly brisk; fast                                                                                                      | 'unable to walk/very slow' vs ' <i>stroll at an easy pace/normal pace/fairly brisk/fast</i> '                                                                                                                                                                                                                                                                                          |
| <i>The following items were completed by employed or self-employed people only</i>                                                                  |                                                                                                                                                                                         |                                                                                                                                                                                                                                                                                                                                                                                        |
| Question                                                                                                                                            | Response categories                                                                                                                                                                     | Further coding for analysis                                                                                                                                                                                                                                                                                                                                                            |
| How satisfied are you with your job as a whole?                                                                                                     | very satisfied; satisfied; dissatisfied; very dissatisfied                                                                                                                              | <i>very satisfied/satisfied</i> vs dissatisfied/very dissatisfied                                                                                                                                                                                                                                                                                                                      |
| Currently, how well do you cope with the physical demand of the job?                                                                                | easily; with some difficulty; with great difficulty; not coping                                                                                                                         | <i>easily</i> vs at least some difficulty                                                                                                                                                                                                                                                                                                                                              |
| Currently, how well do you cope with the mental demand of the job?                                                                                  | easily; with some difficulty; with great difficulty; not coping                                                                                                                         | <i>easily</i> vs at least some difficulty                                                                                                                                                                                                                                                                                                                                              |

2

3

4
